# Supplementary material
Source: PubMed Central journal article supplement (PMC164532)
Supplement: pnas_1130421100_2.pdf [file pnas_1130421100_2.pdf]

A

AACAAAATTTAAGGAAGATTTAAAAAATCATATCAGTATTTGTTTATTACAAGAAAAAGTATAACC
TTTTACAAGAAAATATACTTTTCTCAAGAAAATTTGCCTATTTGGCCACTAGAACCTCAGATTCCTCAAAA
AAAAAATTTGTTTTTTGTTTTCTTTTTTTTATTTCAATTTTTCATTAATATACCCCTTATTTAACTG
ATAAAGGCAAGTTGCAAAAGAGGGTGTGTGTTGCCCCACTCCTCACATAATGTCATAATAATACAATCT
TCGAGTTTTCGCAATTCACATTCCTTTTCCAAAGTCCCAATACATACACATATACAACACACACATA
TACACCCAAAGCTTACTACTGCAAAAGAAATATCGAAACGAGATTTCTCAATTTCTCTCTACTCAAG
AGCTTCATGGCAATGGTGGACCCAAAGTAGCTTCCACATGTTTCTTAAGTTTCAACATTTGAATTTT
TTCCCTTTATAAATAGTAAAGACTTATCTTCAATTTCTAAAATAGTCAAGATTTATATTCCTTAAAA
AATAATTTATTCCTTCTTAAGAAGAAATATAGATTTATTTCTTGTAGTATAGATTTGATGAAAGTG
AGGAAATGGGAGAAAGAAATGAAGAACACAGGATGTCTTCTTCTTAAGTCACTACAAAATCAACAA
AGGAGAAAGCCATTATATATAATAGAGAGATTGAGAGAAGAGATTTATCCAAAAAATATTGCAATTC
TTCTGGAGTGAATAATGCCAGTCCCTTTGCACCATATCCAACACCTCCGGCACCCGGCACTGGCTCCGT
M P V P L A P Y P T P P A P A L A P S 19
CGTACAACACTCCTCCGCAAAATGGTAAAATCTTTCTTAAATGGACAAGCTATTTTAAATCAAAAAGAT
Y N T P P A N 26
CCTCGTTTTCATATTTCTTTACAAAAGTTTTAGTTTCTTATAAGATGATTTTTTGGCTTTTATTAACA
AGATGTTTTTGGTCATGCACTTGGAAAAATCAAAATTTTTCAGATTTCCCAATTTGTTTACTCTTCA
TGGAAAAATTTGCTCAATTTATTTCCCAAGAACATTTATTTTTCACATGTTTCAATTTCAATTTT
GAATGTACTTTTTTGGTTAAAAAATAAATAAAAACACTTGAGATTTGTAGGAAGTACAGTGGGCAG
G S T S G Q 32
AGCCAGTGTAGTGTGTCAGGTGCGAGAACCTTCTGATGATCCCGTCGGAGCAACCTCCGTCTGTGCG
S Q L V C S G C R N L L M Y P V G A T S V C C A 56
CCGCTGTAAAGCCGTACGGCCGTTCTCCGCGGTAATAATCTTTAAACCATAACAAAAGAGTTGG
V C N A V T A V P P P G 68
TTAAAGTCTTAAAGAGATCTTGTAGTTTTGTATAAAGTATTGGGCAATGCAGGAACGGAGATGGCAG
T E M A Q 73
TTGATATGGAGGATGTACACACTCTTAATGTACATTCGTGGAGCTACAAGTGTCAATGTTCTTGT
L V C G G C H T L L M Y I R G A T T S V Q C S C C 97
GTACACTGTTAATCTCGCCCTCGAAGTTTACATGCAATTTGATCTTATATATTACTTATTAACAAA
H T V N L A L E 105
AAACATCGACTTTATATTTGGTGTAAATCAGATTTTATGACTGTTTTGTTTGGTGTGGTGTAG
GGAATATACAAGAAACCAATCCAAAAGAAATATTTTAAATTTTACGATCGAGGTGTTATATAT
TACAATTTTATACATGTTGCGTTTATGACAAATATGATTTGTAAGGATTTAACTCAGATATATATGC
AACTAGGAAAAAATATTTATATATGTTCTGCTTAAATTTATGATGTTTTTATCAAAAATCTTTT
TACAATAAATATATGAGTTTGGTTTTATGATAAAACAAATAAACTAGGTTTGTATATATGTTG
GGCTAGTTTGTGATTTGAGATATAAGATAAATAAAGCAATTTGGATTTATTTGCAAGTCTT
GTTTATGTTAGGTTTGGTTTAAACATTTGCGTTTAAAGTATTAATAACTTTCATGCTTTCGAA
ATGTAATCAGCAAAACCAAGTAGCGCATGGAATTCGGAACCTGCATGATGCTACTAATGATCAATATG
A N Q V A H V N C G N C M M L L M Y Q Y G 126
GAGCAAGATCAGTGAATGTGCCGTTTGAACCTTGTACATCTGTGGGTTAGTCTTCTTCTTATC
A R S V K S A V C N F V T S V G 142
CAAAAGATCCGTTTAAATCAAGTCCAAACTCAAAAATTAACCTCTTTTTTTTTTAAATCAGAACG
TTTCTTATATAATGTTTATTTTTGGTGTCTATGTTTGAATAATGCTTGTAGGGTTCAACGAGCAG
G S T S T 147
ACTGATTCGAAGTTTAAACAATAAACTGGATCTATCTACCTATCAATACATATTGAGTATGAGCAAT
T D S K F N N \* 154
ATAGGAAAGCATCAAACTTTTCACTCTCTCTCGATCAAGAAATCCGGCAGTGTAGTTTGAACCA
TTTTCGGAATTAATGAATATGTAATTCGTGCAAAATTTCTGACTTTGGTCTCTTTGCGGTTGTATAG
AGCTATCTCTCTTTGGTTTTGTTTTGTTCTCTTAAGAAAAATTTGATTCACAGGTTTGAAGAGTG
ATTGAGAAATCAAGCTAGACTTTTATGATGAAAAAATAGATTTTAAATGCTTATGCAATCTCC
GATCTTTTCAAGCATTTTAAAGCACAAAGGACGTCGGTGAACAATTTTCAATTTGTAAGTTTCAAAAATA
TATATGCTAAGAAAAATTTGAAATGTAAAGTGAATCTACAATGAAAAATACATGTAAGAAACCTTTATAC
TTGATAGTCTCAAAAATAAATTTGTAACCAAAAAAATAAAGTATTTATAGAATGTTGGTTTGAAGT
AAGAGATCAATAAACCTTATATATTAGATGAGAAATATAGATGTTGGACATTTCAATAGTATATAAAAC
AAACAAAATAATCGTGATACATAAAGCAATGGGACGAATATGTAATAAATAAAACGAAACCCGAAAAAG

B

LSD1 Zn-finger consensus C..CR..LMY..GAS.V.C..C....V
LOL1 Zn-finger consensus C..C..LLMY..GA.SV.C..C..V

C

Table with 3 main sections. Section 1: Multiple sequence alignment of LSD1 Zn-finger domains from various species (Z. mays, S. propinquum, O. sativa, T. aestivum, A. thaliana, M. trunculata, G. max, S. tuberosum, L. esulentum). Section 2: Multiple sequence alignment of LOL1 Zn-finger domains from the same species. Section 3: Conservation scores for the LOL1 Zn-finger domains, showing percentages and accession numbers for each position.
